# Supplementary material
Source: PubMed Central journal article supplement (PMC2729006)
Supplement: 0901720106_Appendix_PDF.pdf [file 0901720106_Appendix_PDF.pdf]

## Supporting Appendix

### Results and parameter values

Table S1 contains natural history parameter values of the natural history model. The series of differential equations representing the age-structured mathematical model of tuberculosis was programmed in Berkeley Madonna (Technical Appendix). Using the Downhill Simplex method(1), both the contact rate and the case detection ratio were permitted to vary while fitting the model to the annual incidence rates of pulmonary smear-positive disease and tuberculosis-related mortality reported by the WHO for 2006 (2) (Table S2). The case detection ratio was permitted to vary because of suspected under-reporting of treatment among cases.

Table S1: Key tuberculosis natural history parameters.

| <b>Assumption</b>                                                                         | <b>Parameter Value</b> | <b>Value Range for the Sensitivity Analysis (Min, Max)</b> | <b>Sources</b> |
|-------------------------------------------------------------------------------------------|------------------------|------------------------------------------------------------|----------------|
| Proportion of new cases entering fast breakdown upon infection                            |                        |                                                            |                |
| Children                                                                                  | 5%                     | (4.3%, 5.8%)                                               | (4-14)         |
| Adults                                                                                    | 15%                    | (12.8%, 17.3%)                                             | (4-14)         |
| Progression rate (per year) from latency to early TB disease for unvaccinated progressors |                        |                                                            |                |
| Fast progressors                                                                          | 0.9                    |                                                            | (12, 15-23)    |
| With adjustment for early TB disease                                                      | 1.64                   | (1.39, 1.89)                                               | Assumption     |
| Slow progressors                                                                          | 0.00075                | (0.00064, 0.00086)                                         | (12, 15-23)    |
| Fractional reduction in susceptibility to reinfection due to prior exposure to TB         | 65%                    | (55.3%, 74.8%)                                             | (12, 24, 25)   |
| Proportions of new unvaccinated TB disease cases flowing from latency                     |                        |                                                            |                |
| Smear-positive pulmonary                                                                  |                        |                                                            |                |
| Children                                                                                  | 10%                    | (8.5%, 11.5%)                                              | (26, 27)       |

| <b>Assumption</b>                                                                                                                      | <b>Parameter Value</b> | <b>Value Range for the Sensitivity Analysis (Min, Max)</b> | <b>Sources</b>                     |
|----------------------------------------------------------------------------------------------------------------------------------------|------------------------|------------------------------------------------------------|------------------------------------|
| Adults<br>Smear-negative pulmonary                                                                                                     | 50%                    | (42.5%, 57.5%)                                             | (15, 23, 24, 27-30)                |
| Children<br>Adults                                                                                                                     | 65%<br>40%             | Adjusted to total to<br>100%                               | (14, 27)<br>(14, 27)               |
| Non-pulmonary<br>Children<br>Adults                                                                                                    | 25%<br>10%             | Adjusted to total to<br>100%                               | (26, 31-33)<br>(15, 23, 24, 27-30) |
| TB disease mortality rate (per year) for<br>unvaccinated and untreated subjects                                                        |                        |                                                            |                                    |
| Smear-positive pulmonary                                                                                                               | 0.25                   | (0.213, 0.288)                                             | (4, 17, 24, 27, 34-43)             |
| Smear-negative pulmonary                                                                                                               | 0.10                   | (0.085, 0.115)                                             | (4, 17, 24, 27, 34-43)             |
| Non-pulmonary                                                                                                                          | 0.10                   | (0.085, 0.115)                                             | (4, 17, 24, 27, 34-43)             |
| Spontaneous recovery rate (per year) from<br>TB disease                                                                                | 0.1                    | (0.085, 0.115)                                             | (4, 40-42, 44, 45)                 |
| Relative infectivity for smear-negative<br>pulmonary disease with respect to<br>untreated smear-positive pulmonary<br>disease subjects | 25%                    | (21.3%, 28.8%)                                             | (46)                               |

Table S2: Key region-specific tuberculosis epidemiology parameters (2).

| Region | Population (1000s) | Incidence of SP (per million) | TB-related mortality rate (per million) | Treatment success proportion | Unsuccessful Treatment Proportions |                   |         |             |               | WHO Case Detection Ratio (CDR) – prior to multiplication by the <i>CDRfitFactor</i> |      |      | Contact rate ( <i>eta</i> ) | CDR fit factor |
|--------|--------------------|-------------------------------|-----------------------------------------|------------------------------|------------------------------------|-------------------|---------|-------------|---------------|-------------------------------------------------------------------------------------|------|------|-----------------------------|----------------|
|        |                    |                               |                                         |                              | Death                              | Treatment Failure | Default | Transferred | Not Evaluated | SP                                                                                  | SN   | NP   |                             |                |
| AFRH   | 539,801            | 1,673                         | 842                                     | 0.75                         | 0.07                               | 0.01              | 0.09    | 0.05        | 0.03          | 0.51                                                                                | 0.43 | 0.43 | 185.026                     | 1.43166        |
| AFRL   | 198,283            | 931                           | 448                                     | 0.72                         | 0.05                               | 0.02              | 0.14    | 0.04        | 0.02          | 0.49                                                                                | 0.25 | 0.25 | 151.423                     | 1.77444        |
| AMR    | 560,276            | 268                           | 85                                      | 0.79                         | 0.05                               | 0.01              | 0.07    | 0.05        | 0.03          | 0.80                                                                                | 0.42 | 0.42 | 169.835                     | 1.22237        |
| EEUR   | 387,265            | 430                           | 148                                     | 0.71                         | 0.04                               | 0.05              | 0.05    | 0.02        | 0.12          | 0.47                                                                                | 0.81 | 0.81 | 101.063                     | 1.22819        |
| EMR    | 541,704            | 468                           | 206                                     | 0.83                         | 0.03                               | 0.01              | 0.08    | 0.03        | 0.03          | 0.45                                                                                | 0.53 | 0.53 | 101.767                     | 1.42458        |
| SEAR   | 1,656,529          | 808                           | 309                                     | 0.84                         | 0.04                               | 0.02              | 0.06    | 0.01        | 0.03          | 0.64                                                                                | 0.51 | 0.51 | 154.851                     | 1.26211        |
| WPR    | 1,595,689          | 532                           | 182                                     | 0.92                         | 0.02                               | 0.01              | 0.02    | 0.01        | 0.02          | 0.78                                                                                | 0.50 | 0.50 | 159.837                     | 1.13285        |

AFRH = Africa, annual incidence of HIV  $\geq$  4%; AFRL = Africa, annual incidence of HIV  $<$  4%; AMR = Latin America; EEUR = Eastern Europe; EMR = Eastern Mediterranean; SEAR = South-East Asia; WPR = Western Pacific; SP = sputum smear-positive pulmonary tuberculosis

### **Rates of change of TB incidence and TB-related mortality**

The benefits from all of the novel treatment regimens are immediate (results not shown). For the active-treatment regimens, the magnitude of the effect is greatest within the first 2 years, steadily waning thereafter until approximately 2044. At this point, the incidence rates of TB disease and TB-related death no longer decline. The mass latent therapy treatment regimen and its combination with active treatment regimen 2 results in a large reduction in the incidence of TB disease within the first two years. Then, as the reservoir of individuals with latent slow infection is depleted, the magnitude of the incidence reduction drops precipitously over the next year. Three years after intervention implementation (2018), the magnitude of the annual reduction in the incidence of TB disease for regimens involving latent therapy wanes steadily with annual incidence rates continuing to decline past 2050.

### **Sensitivity and uncertainty analyses**

To explore the sensitivity of our model results to parameter values, we conducted univariate sensitivity and uncertainty analyses over specified ranges for representative parameter values. We varied each parameter over a range of  $\pm 15\%$  of the original parameter value, completing 11 runs evenly spaced over the range. For each particular parameter, each age group experiences the same percent change from its original parameter value within a single model run. The selection of these natural history (Figure S1A-H) and novel intervention (Figure S2A-D) parameters for presentation reflects those that are most influential within this formulation of the model, and their results are representative across all model parameters. Given the available evidentiary support, the ranges of variation represent plausible values for these parameters. The purpose of these sensitivity analyses serves both to establish the model sensitivity to the parameter values,

as well as to ascertain whether the uncertainty in the parameter value used in the main results significantly affects the model results.

Figure S1: Sensitivity of TB natural history parameters.

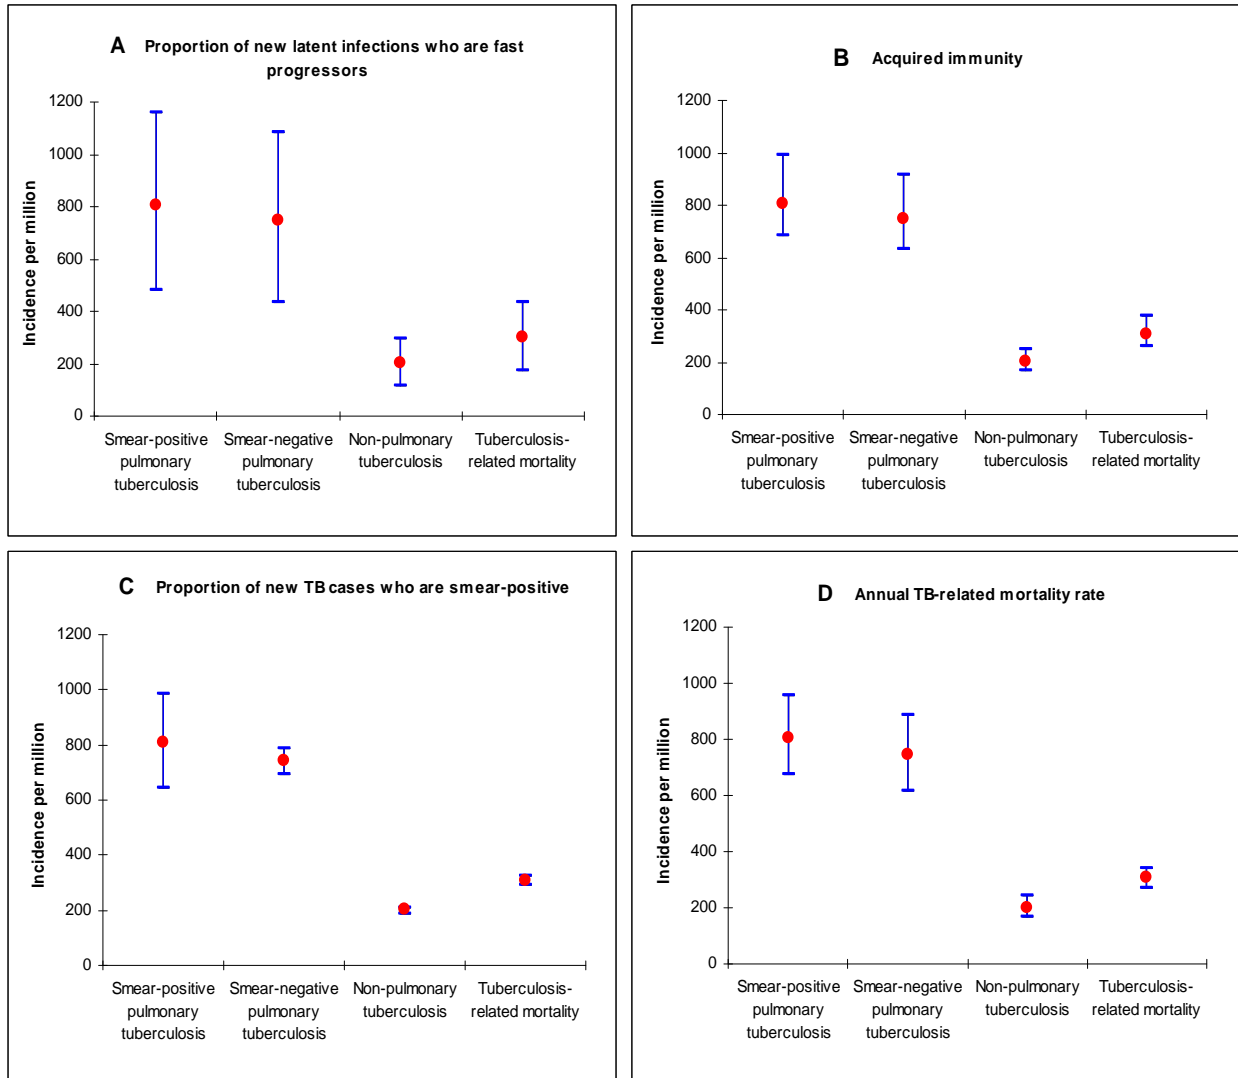

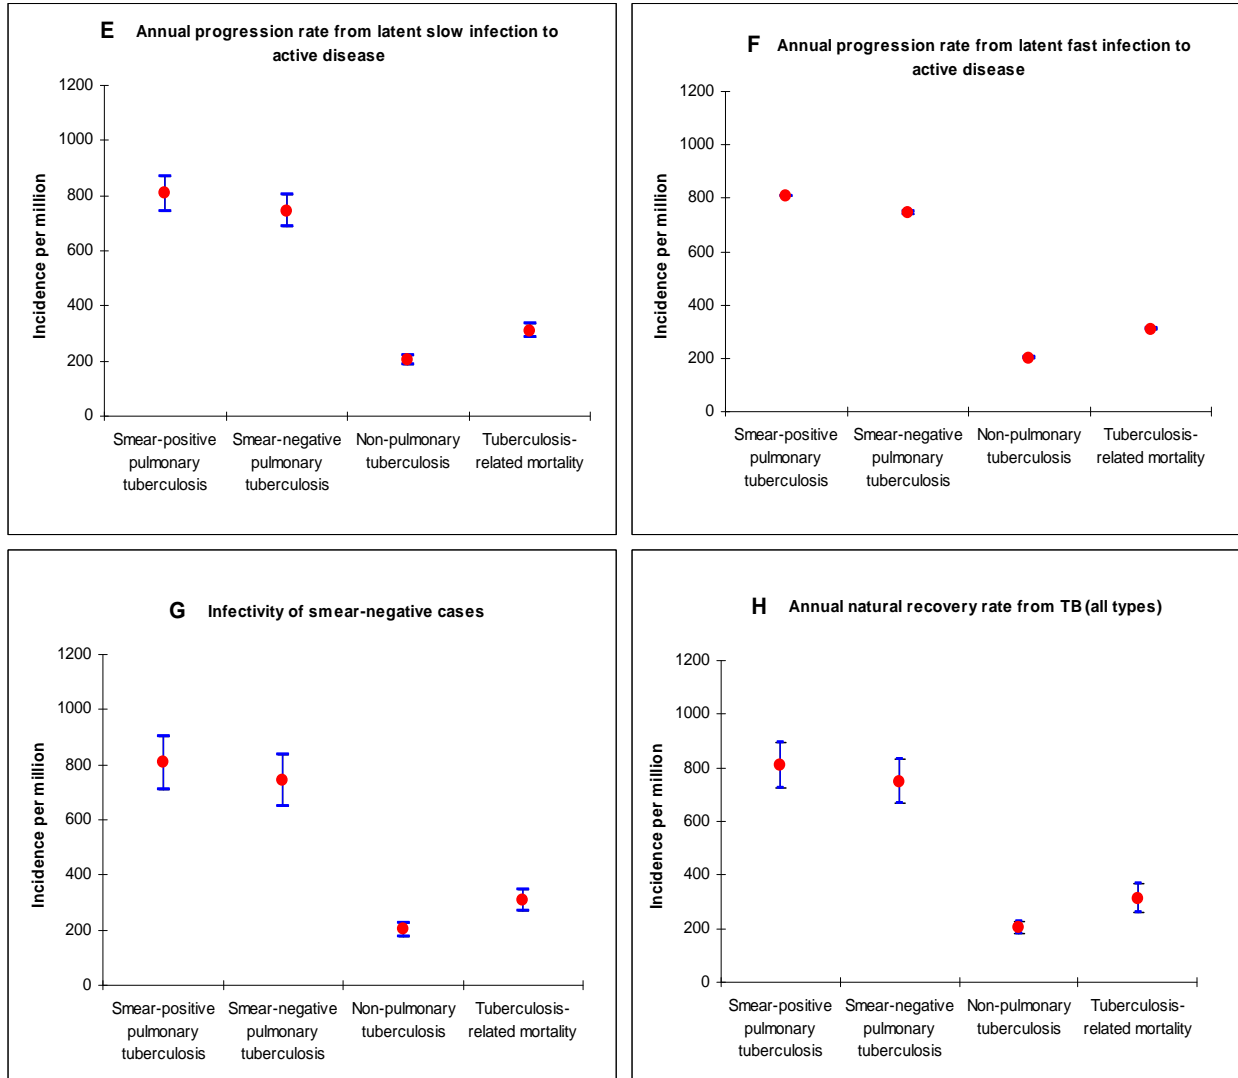

An examination of the natural history parameters (Figure S1) shows that of those parameters tested, the model is most sensitive to a change in the proportion of new latent infections who are fast progressors. For example, a  $\pm 15\%$  change in the proportion of new latent infections who are fast progressors results in an  $\sim \pm 41\%$  change in the incidence per million of smear-positive pulmonary TB, a  $\sim \pm 42\%$  change in the incidence per million of smear-negative pulmonary TB, a  $\sim \pm 42\%$  change in the incidence per million of non-pulmonary TB, and a  $\sim \pm 41\%$  change in the incidence per million of TB-related mortality (Figure S1A). By contrast, for a  $\pm 15\%$  change in

the annual progression rate from latent fast infection to active disease results in a  $\sim\pm 0.3\%$  change in the incidence per million of smear-positive pulmonary TB, a  $\sim\pm 0.4\%$  change in the incidence per million of smear-negative pulmonary TB, a  $\sim\pm 0.4\%$  change in the incidence per million of non-pulmonary TB, and a  $\sim\pm 0.4\%$  change in the incidence per million of TB-related mortality (Figure S1F).

Figure S2: Sensitivity of novel intervention parameters.

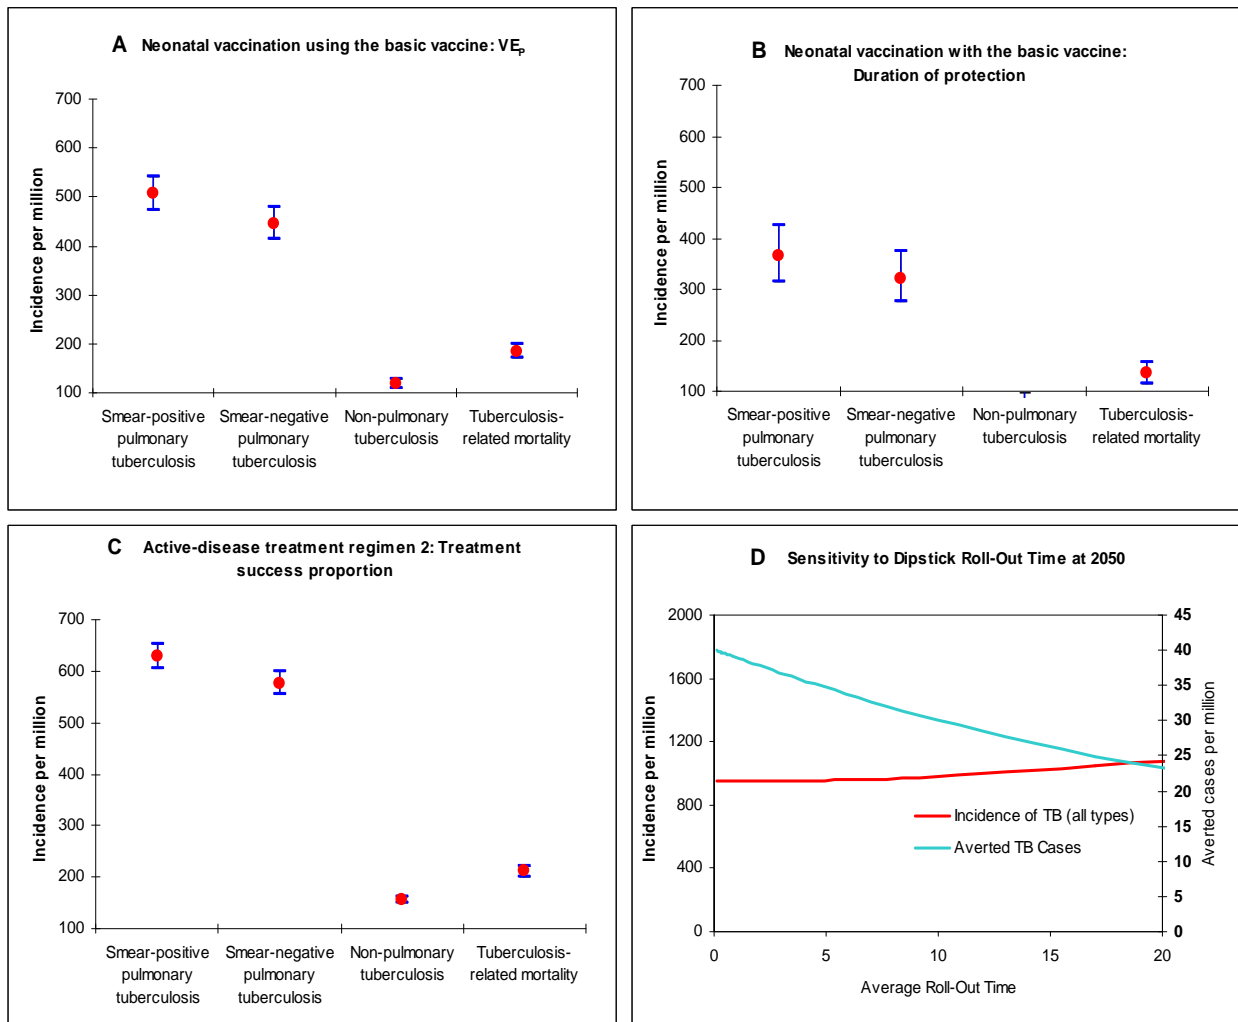

An examination of the novel intervention parameters (Figure S2) shows that variation in either the fraction of persons becoming slow rather than fast progressors, or the duration of protection has relatively little effect on smear-positive and smear-negative incidences, and a reduced effect on non-pulmonary TB or TB-related mortality (Figure S2A-B). A  $\pm 15\%$  change in the fraction of persons becoming slow rather than fast progressors results in a  $\sim \pm 7\%$  change in the incidence per million of smear-positive pulmonary TB, a  $\sim \pm 8\%$  change in the incidence per million of smear-negative pulmonary TB, a  $\sim \pm 8\%$  change in the incidence per million of non-pulmonary TB, and a  $\sim \pm 7\%$  change in the incidence per million of TB-related mortality (Figure S2A). Variation in the treatment success proportion has even smaller effects on final incidence of smear-positive, smear-negative and non-pulmonary TB, as well as TB-related mortality (Figure S2C). Although incidence at 2050 is not greatly affected if the average roll out time of NAAT varies from 0 to 20 years, the cumulative number of cases averted substantially decreases (Figure S2D).

Overall, the model is robust to uncertainty in the parameter values, and the changes that do occur in the model results are predictable based on the construction of the model.

At a  $VE_P$  of 60%, the Aeras target value, the vaccine's reduction of the probability of becoming a fast progressor produces a stronger reduction in TB incidence by 2050 than either of two additional effects on infectiousness and lifetime probability of developing active TB disease, alone or combined (results not shown).



### **Other WHO regions**

The results for the other WHO regions (2) are qualitatively similar (Table S3). In the Eastern European region, where the current active disease treatment success proportion is just 71%, the percentage of cases prevented by the novel treatment regimens by 2050 was higher, 10%, 22%, and 26%, than in the Southeast Asia region, 6%, 15%, 17%. The numbers for the two African regions are optimistic, as they do not account for HIV in the regions or differing efficacy of the novel interventions in HIV-infected people. The effect of HIV on novel TB therapies was studied by Sanchez et al (3).

Table S3: Regional estimates of the number of tuberculosis cases (all types) and tuberculosis-related deaths prevented from 2015 to 2050 with novel interventions.

| Intervention Strategy                                                                                                                       | Cases of tuberculosis (all types)             |      |      |      |      |       |      | Tuberculosis-related deaths |      |     |      |     |      |      |
|---------------------------------------------------------------------------------------------------------------------------------------------|-----------------------------------------------|------|------|------|------|-------|------|-----------------------------|------|-----|------|-----|------|------|
|                                                                                                                                             | AFRH                                          | AFRL | AMR  | EEUR | EMR  | SEAR  | WPR  | AFRH                        | AFRL | AMR | EEUR | EMR | SEAR | WPR  |
| <b>No novel intervention</b>                                                                                                                | 70.4                                          | 14.1 | 11.2 | 12.5 | 19.1 | 101.7 | 64.0 | 15.9                        | 3.1  | 1.7 | 2.1  | 3.9 | 17.9 | 10.2 |
|                                                                                                                                             | <i>Cumulative incidence (millions)</i>        |      |      |      |      |       |      |                             |      |     |      |     |      |      |
|                                                                                                                                             | <i>Cumulative number prevented (millions)</i> |      |      |      |      |       |      |                             |      |     |      |     |      |      |
| <b>Vaccination</b>                                                                                                                          |                                               |      |      |      |      |       |      |                             |      |     |      |     |      |      |
| Neonatal vaccination with adolescent boost:                                                                                                 |                                               |      |      |      |      |       |      |                             |      |     |      |     |      |      |
| Basic pre-exposure vaccine only                                                                                                             | 12.7                                          | 2.5  | 2.0  | 1.8  | 3.0  | 18.2  | 11.5 | 2.6                         | 0.5  | 0.3 | 0.2  | 0.6 | 3.0  | 1.7  |
| Basic pre-exposure vaccine with the additional effects                                                                                      | 17.9                                          | 3.3  | 2.5  | 2.3  | 3.9  | 23.8  | 14.9 | 3.7                         | 0.6  | 0.3 | 0.3  | 0.7 | 3.9  | 2.2  |
| Mass vaccination (includes neonatal vaccination):                                                                                           |                                               |      |      |      |      |       |      |                             |      |     |      |     |      |      |
| Basic pre-exposure vaccine only                                                                                                             | 35.9                                          | 9.0  | 8.0  | 8.8  | 13.4 | 68.2  | 44.7 | 7.7                         | 1.8  | 1.1 | 1.4  | 2.6 | 11.5 | 6.7  |
| Basic pre-exposure vaccine with the additional effects                                                                                      | 43.5                                          | 9.9  | 8.5  | 9.4  | 14.3 | 74.0  | 47.8 | 9.3                         | 2.0  | 1.2 | 1.5  | 2.8 | 12.4 | 7.2  |
| Neonatal vaccination with 3-year mass catch-up, basic pre-exposure vaccine with additional effects                                          | 38.2                                          | 9.0  | 7.9  | 8.7  | 13.3 | 67.9  | 44.4 | 8.2                         | 1.8  | 1.1 | 1.4  | 2.6 | 11.4 | 6.7  |
| Mass vaccination with only a post-exposure effect                                                                                           | 16.3                                          | 3.7  | 3.4  | 3.9  | 6.1  | 30.1  | 19.9 | 3.5                         | 0.7  | 0.4 | 0.6  | 1.2 | 5.0  | 2.9  |
| Neonatal vaccination, basic pre-exposure with additional effects, plus mass vaccination with post-exposure effect                           | 51.3                                          | 9.6  | 7.6  | 8.7  | 13.5 | 73.2  | 45.3 | 10.9                        | 1.9  | 1.0 | 1.4  | 2.6 | 12.3 | 6.8  |
| Mass vaccination with basic pre-exposure vaccine, plus mass vaccination with post-exposure effect                                           | 47.1                                          | 10.7 | 9.1  | 10.1 | 15.4 | 80.2  | 51.5 | 10.1                        | 2.2  | 1.2 | 1.6  | 3.0 | 13.5 | 7.7  |
| Mass vaccination with basic pre-exposure vaccine with additional effects, plus mass vaccination with post-exposure effect                   | 57.3                                          | 11.7 | 9.5  | 10.6 | 16.3 | 85.9  | 54.4 | 12.3                        | 2.4  | 1.3 | 1.7  | 3.2 | 14.5 | 8.2  |
| Neonatal vaccination with 3-year mass catch-up, basic pre-exposure with additional effects, plus mass vaccination with post-exposure effect | 56.4                                          | 11.4 | 9.3  | 10.4 | 15.9 | 83.8  | 59.1 | 12.1                        | 2.3  | 1.3 | 1.7  | 3.1 | 14.1 | 8.0  |
| <b>Treatment regimens</b>                                                                                                                   |                                               |      |      |      |      |       |      |                             |      |     |      |     |      |      |
| Active-disease regimen 1                                                                                                                    | 8.0                                           | 1.6  | 1.0  | 1.6  | 2.0  | 8.3   | 2.6  | 2.5                         | 0.5  | 0.2 | 0.3  | 0.5 | 2.0  | 0.5  |
| Active-disease regimen 2                                                                                                                    | 16.3                                          | 3.3  | 2.0  | 3.5  | 4.1  | 19.3  | 6.2  | 5.0                         | 0.9  | 0.4 | 0.7  | 1.1 | 4.5  | 1.3  |
| Active-disease regimen 3                                                                                                                    | 19.5                                          | 3.9  | 2.5  | 4.1  | 5.0  | 22.9  | 7.5  | 5.9                         | 1.1  | 0.5 | 0.9  | 1.3 | 5.3  | 1.5  |
| Mass latent therapy                                                                                                                         | 34.0                                          | 7.8  | 6.8  | 8.1  | 12.7 | 64.8  | 41.4 | 7.3                         | 1.6  | 0.9 | 1.3  | 2.5 | 10.8 | 6.1  |
| Active-disease regimen 2 plus mass latent therapy                                                                                           | 48.2                                          | 9.9  | 7.8  | 9.7  | 14.5 | 75.6  | 44.5 | 11.0                        | 2.1  | 1.1 | 1.6  | 2.9 | 13.1 | 6.7  |
| <b>Diagnostics</b>                                                                                                                          |                                               |      |      |      |      |       |      |                             |      |     |      |     |      |      |
| LED                                                                                                                                         | -                                             | -    | 1.6  | -    | -    | 11.7  | 10.4 | -                           | -    | 0.3 | -    | -   | 4.2  | 3.0  |
| NAAT                                                                                                                                        | -                                             | -    | 3.6  | -    | -    | 24.4  | 17.2 | -                           | -    | 0.6 | -    | -   | 4.2  | 2.6  |
| Dipstick                                                                                                                                    | -                                             | -    | 5.0  | -    | -    | 39.4  | 25.4 | -                           | -    | 0.8 | -    | -   | 8.0  | 3.9  |
| <b>Combination</b>                                                                                                                          |                                               |      |      |      |      |       |      |                             |      |     |      |     |      |      |
| Mass vaccination with basic pre-exposure effects plus active-disease regimen 2 plus NAAT                                                    | -                                             | -    | 9.0  | -    | -    | 77.8  | 49.3 | -                           | -    | 1.4 | -    | -   | 13.9 | 7.7  |

Even without taking the complications due to HIV into account, in the Sub-Saharan region with high HIV incidence, and to a lesser extent, in the Sub-Saharan region with low HIV incidence, mass vaccination with a pre-exposure vaccine prevents relatively fewer case and deaths than in the other regions (Table S3). The reason is due to the higher TB incidence, and consequently prevalence, in these two regions (Table S2), so the prevalence of uninfected people to benefit from a pre-exposure vaccine is much lower. Preventive treatment of latently infected people is 20 to 25% less effective than in the South-East Asia region (2).

## REFERENCES

1. Press W (1997) *Numerical Recipes in C: The Art of Scientific Computing* (Cambridge University Press, New York).
2. WHO (2008) Global Tuberculosis Control: Surveillance, Planning, Financing. in *WHO Report 2008* (WHO, Geneva).
3. Sanchez MS, *et al.* (2008) Impact of HIV on novel therapies for tuberculosis control. *AIDS* 22(8):963-972.
4. Dye C, Garnett GP, Sleeman K, & Williams BG (1998) Prospects for worldwide tuberculosis control under the WHO DOTS strategy. Directly observed short-course therapy. *Lancet* 352(9144):1886-1891.
5. Comstock GW (1982) Epidemiology of tuberculosis. *Am Rev Respir Dis* 125(3 Pt 2):8-15.
6. Ferebee SH (1970) Controlled chemoprophylaxis trials in tuberculosis. A general review. *Bibl Tuberc* 26:28-106.
7. Krishnamurthy V CK (1990) Risk of pulmonary tuberculosis associated with exogenous reinfection and endogenous reactivation in a south Indian rural population - A mathematical estimate. *Indian J Tuberc* 37:63-67.
8. Krishnamurthy V NS, Gothi G *et al.* (1976) Incidence of tuberculosis among newly infected populations and in relation to the duration of infected status. *Indian J Tuberc* 33:1-3.
9. Styblo K (1986) Tuberculosis control and surveillance. *Advances in Respiratory Medicine*, ed Flenley DRJ (Churchill Livingstone, Edinburgh), pp 77-108.
10. Sutherland I (1968) The ten-year incidence of clinical tuberculosis following 'conversion' in 2,550 individuals aged 14 to 19 years. in *Tuberculosis Surveillance and Research Unit Progress Report* (The Hague, Royal Netherlands Tuberculosis Association (KNCV)).
11. Sutherland I (1976) Recent studies in the epidemiology of tuberculosis, based on the risk of being infected with tubercle bacilli. *Adv Tuberc Res* 19:1-63.
12. Sutherland I, Svandova E, & Radhakrishna S (1982) The development of clinical tuberculosis following infection with tubercle bacilli. 1. A theoretical model for the development of clinical tuberculosis following infection, linking from data on the risk of tuberculous infection and the incidence of clinical tuberculosis in the Netherlands. *Tubercle* 63(4):255-268.

13. Vynnycky E (1996) An Investigation of the Transmission Dynamics of *M. tuberculosis*, PhD dissertation. PhD (University of London).
14. Vynnycky E & Fine PE (1997) The natural history of tuberculosis: the implications of age-dependent risks of disease and the role of reinfection. *Epidemiol Infect* 119(2):183-201.
15. Resch SC, Salomon JA, Murray M, & Weinstein MC (2006) Cost-effectiveness of treating multidrug-resistant tuberculosis. *PLoS Med* 3(7):e241.
16. Murray CJ & Salomon JA (1998) Modeling the impact of global tuberculosis control strategies. *Proc Natl Acad Sci U S A* 95(23):13881-13886.
17. Styblo K & Enarson DA (1991) *Epidemiology of Tuberculosis* (Royal Netherlands Tuberculosis Association).
18. Styblo K (1986) Tuberculosis control and surveillance. *Recent advances in respiratory medicine London: Churchill*:77-108.
19. Comstock GW (1982) Epidemiology of tuberculosis. *Am Rev Respir Dis* 125(3 Pt 2):8-15.
20. Smith PG & Moss AR (1994) Epidemiology of Tuberculosis. *Tuberculosis: Pathogenesis, Protection, and Control*.
21. Murphy BM, Singer BH, Anderson S, & Kirschner D (2002) Comparing epidemic tuberculosis in demographically distinct heterogeneous populations. *Math Biosci* 180:161-185.
22. Murphy BM, Singer BH, & Kirschner D (2003) On treatment of tuberculosis in heterogeneous populations. *J Theor Biol* 223(4):391-404.
23. Vynnycky E & Fine PE (2000) Lifetime risks, incubation period, and serial interval of tuberculosis. *Am J Epidemiol* 152(3):247-263.
24. Dye C & Williams BG (2007) Eliminating human tuberculosis in the twenty-first century. *J R Soc Interface*.
25. Vynnycky E & Fine PE (1997) The natural history of tuberculosis: the implications of age-dependent risks of disease and the role of reinfection. *Epidemiol Infect* 119(2):183-201.
26. Barnett GD & Styblo K (1977) Bacteriological and X-ray status of tuberculosis following primary infection acquired during adolescence or later. *Bull Int Union Tuberc* 52:5-16.
27. Murray CSK, Rouillon A. (1993) Tuberculosis. *Disease Control Priorities in Developing Countries*, ed DT J (Oxford University Press).
28. Vynnycky E & Fine PE (1997) The annual risk of infection with *Mycobacterium tuberculosis* in England and Wales since 1901. *Int J Tuberc Lung Dis* 1(5):389-396.
29. Murray CJ & Salomon JA (1998) Modeling the impact of global tuberculosis control strategies. *Proc Natl Acad Sci U S A* 95(23):13881-13886.
30. Porco TC & Blower SM (1998) Quantifying the intrinsic transmission dynamics of tuberculosis. *Theor Popul Biol* 54(2):117-132.
31. Lobato MN, Cummings K, Will D, & Royce S (1998) Tuberculosis in children and adolescents: California, 1985 to 1995. *Pediatr Infect Dis J* 17(5):407-411.
32. Snider DE, Jr., et al. (1988) Tuberculosis in children. *Pediatr Infect Dis J* 7(4):271-278.
33. Spyridis P, et al. (2003) The impact of Greece's childhood tuberculosis screening programme on the epidemiological indexes in the greater Athens area. *Int J Tuberc Lung Dis* 7(3):248-253.
34. Rutledge C & Crouch J (1919) The ultimate results in 1694 cases of tuberculosis treated at the Modern Woodmen Sanatorium of America. *Am Rev Tuberc* 2:755-756.
35. Berg G (1939) The prognosis of open pulmonary tuberculosis. A clinical statistical analysis. *Acta Tuberc Scand Suppl* IV:1-207.
36. Drolet G (1938) Present trend of case fatality rates in tuberculosis. *Am Rev Tuberc* 37:125-151.
37. Thompson B (1943) Survival rates in pulmonary tuberculosis. *Br Med J* 2:721.

38. Tattersall W (1947) The survival of sputum positive consumptives. A study of 1192 cases in a county borough between 1914 and 1940. *Tubercle* 28:85.
39. Lowe C (1954) Recent trends in survival of patients with respiratory tuberculosis. *Br J Prev Soc Med* 8:91-98.
40. Springett VH (1971) Ten-year results during the introduction of chemotherapy for tuberculosis. *Tubercle* 52(2):73-87.
41. WHO (1974) Tuberculosis in a rural population of South India: a five-year epidemiological study. *Bull World Health Organ* 51(5):473-488.
42. Grzybowski S & Enarson D (1978) [Results in pulmonary tuberculosis patients under various treatment program conditions]. *Bull Int Union Tuberc* 53(2):70-75.
43. Lindhart M (1939) The statistics of pulmonary tuberculosis in Denmark, 1925-1934. A statistical investigation of the occurrence of pulmonary tuberculosis in the period 1925-1934, worked out on the basis of the Danish National Health Service File of notified cases and deaths. (Ejnar Munksgaard, Copenhagen).
44. Olakowski T (1973) Assignment report on a tuberculosis longitudinal survey. ed National Tuberculosis Institute B (WHO).
45. Enarson D & Rouillon A (1994) The epidemiological basis of tuberculosis control. *Clinical Tuberculosis*, ed Davies P (Chapman and Hall, London).
46. Small PM, *et al.* (1994) The epidemiology of tuberculosis in San Francisco. A population-based study using conventional and molecular methods. *N Engl J Med* 330(24):1703-1709.
